# Supplementary material
Source: PubMed Central journal article supplement (PMC6413800)
Supplement: jciinsight-4-123337-s124.pdf [file jciinsight-4-123337-s124.pdf]

## **Supplemental Data**

**Ciliary gene *RPGRIP1L* is required for hypothalamic arcuate neuron development.**

**Liheng Wang, Alain J. De Solis, Yossef Goffer, Kathryn E. Birkenbach, Staci E. Engle, Ross Tanis, Jacob M. Levenson, Xueting Li, Richard Rausch, Manika Purohit, Jen-Yi Lee, Jerica Tan, Maria Caterina De Rosa, Claudia A. Doege, Holly L. Aaron, Gabriela J. Martins, Jens C. Brüning, Dieter Egli, Rui Costa, Nicolas Berbari, Rudolph L. Leibel and George Stratigopoulos**

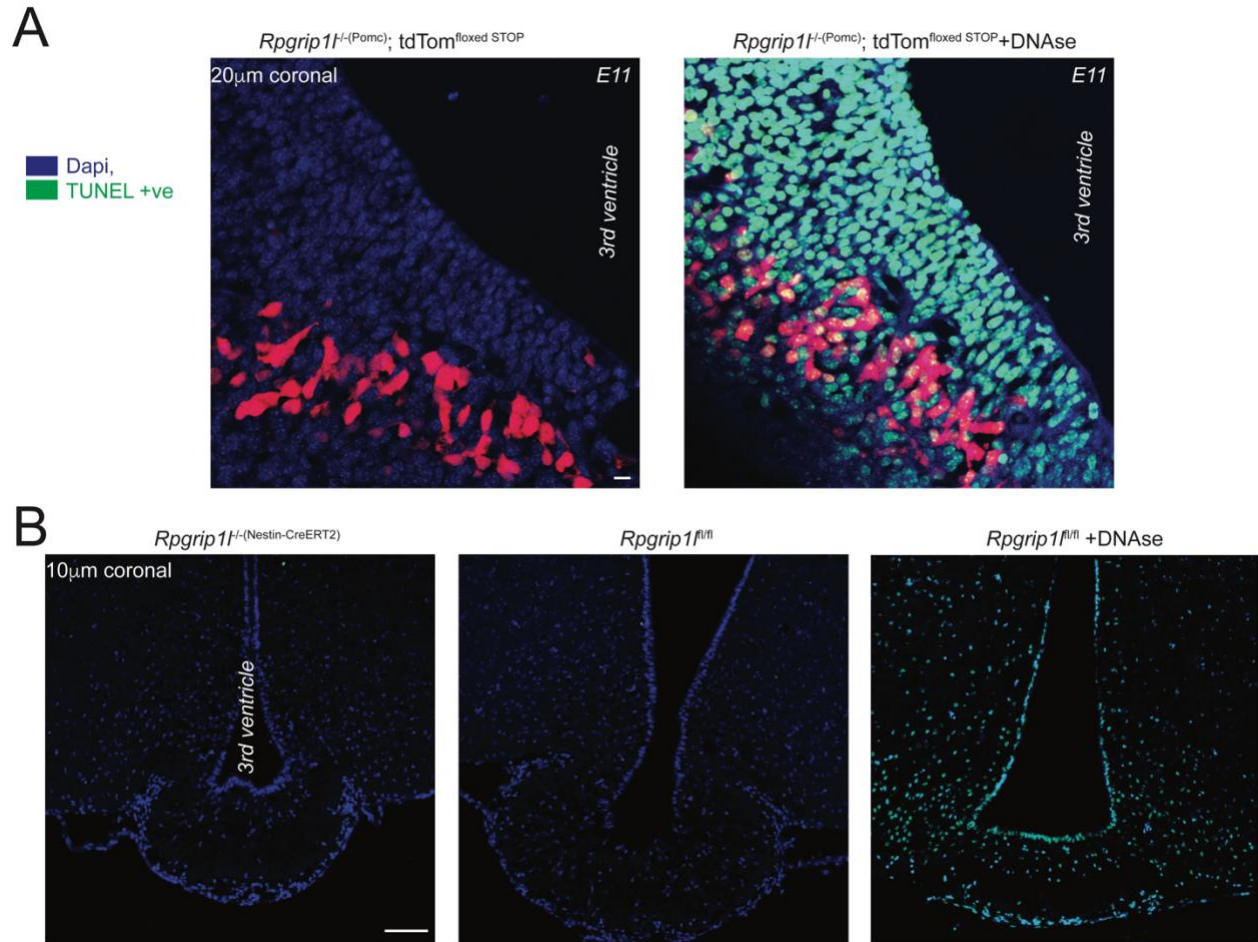

**Fig. S1.** (Supplemental data for **Fig. 4**) Cell death was not detected upon *Rpgrip11* hypomorphism. (A) No TUNEL staining was detected in the developing hypothalamus of *Rpgrip11<sup>-/-</sup>(Pomc)* E11 embryos ( $n=3$ ) segregating for the Rosa26 floxed STOP tdTomato (tdTom<sup>floxed stop</sup>). At E11, Pomc-positive progenitors appear. Scale bar - 10 $\mu$ m. (B) Lack of TUNEL staining in mice deleted for *Rpgrip11* in the adult CNS (*Rpgrip11<sup>hyp</sup>(Nestin)*;  $n=3$ ) 1 day after tamoxifen injection. Similar results were obtained after 2 and 3 days after Tamoxifen injection. Scale bar - 100 $\mu$ m.

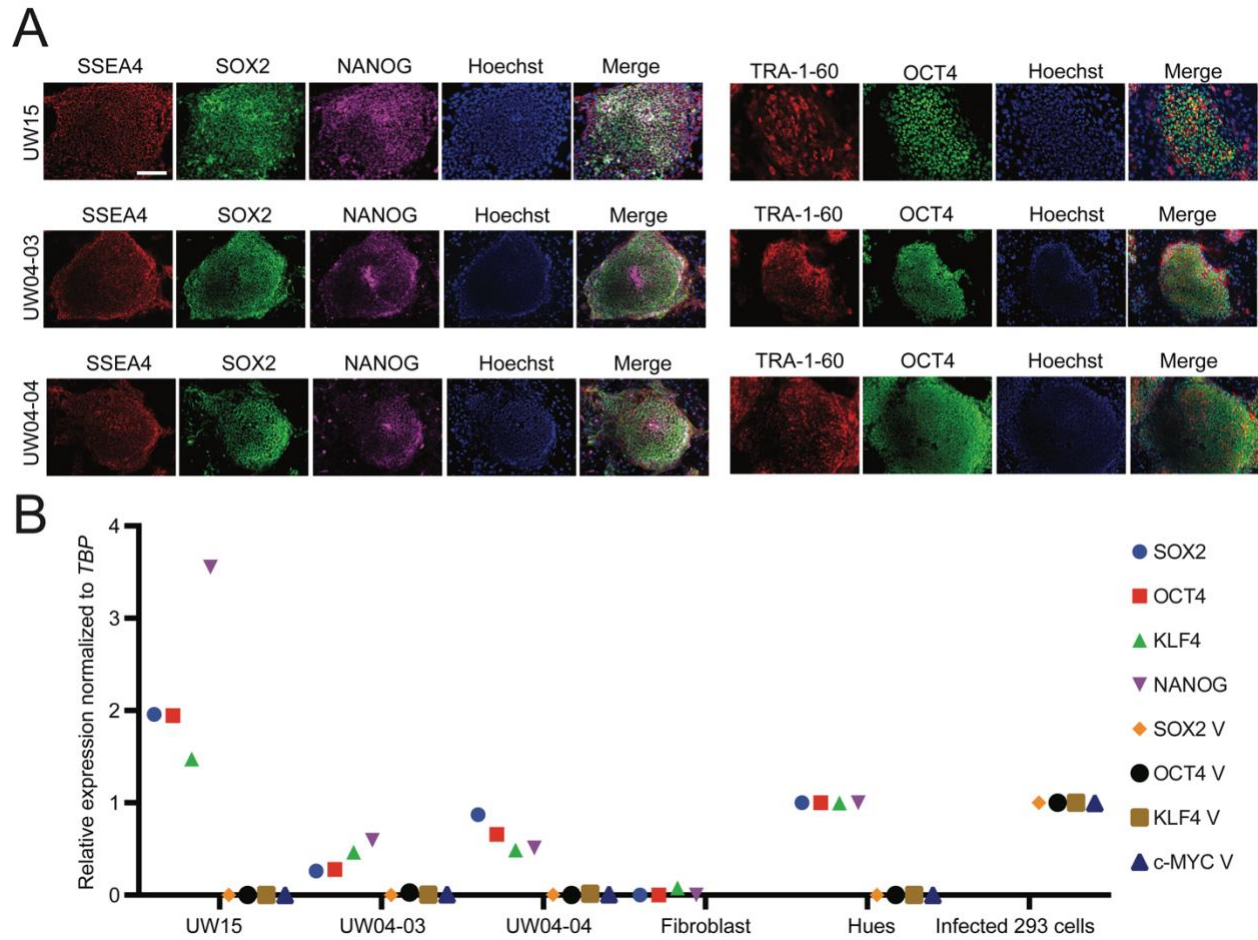

**Fig. S2.** (Supplemental data for **Fig. 6**) Proof of pluripotency of JBST iPSCs. **(A)** Immunopositive JBST iPSC lines UW15, UW04-03 and UW04-04 for pluripotency markers SSEA4, SOX2, NANOG, TRA-1-60 and OCT4. Scale bar - 200 $\mu$ m. **(B)** JBST iPSCs express pluripotency markers SOX2, OCT4, KLF4 and NANOG. Virus-packaged genes used to generate iPSCs from JBST fibroblasts (SOX2 V, OCT4 V, KLF4 V and c-MYC V) are silenced in JBST iPSCs. Untransduced fibroblasts were used as a negative control. Hues and viro-transduced 293 cells were used as a positive control for pluripotent gene and viral gene expression respectively. Expression was normalized to the TATA box binding protein (*TBP*).

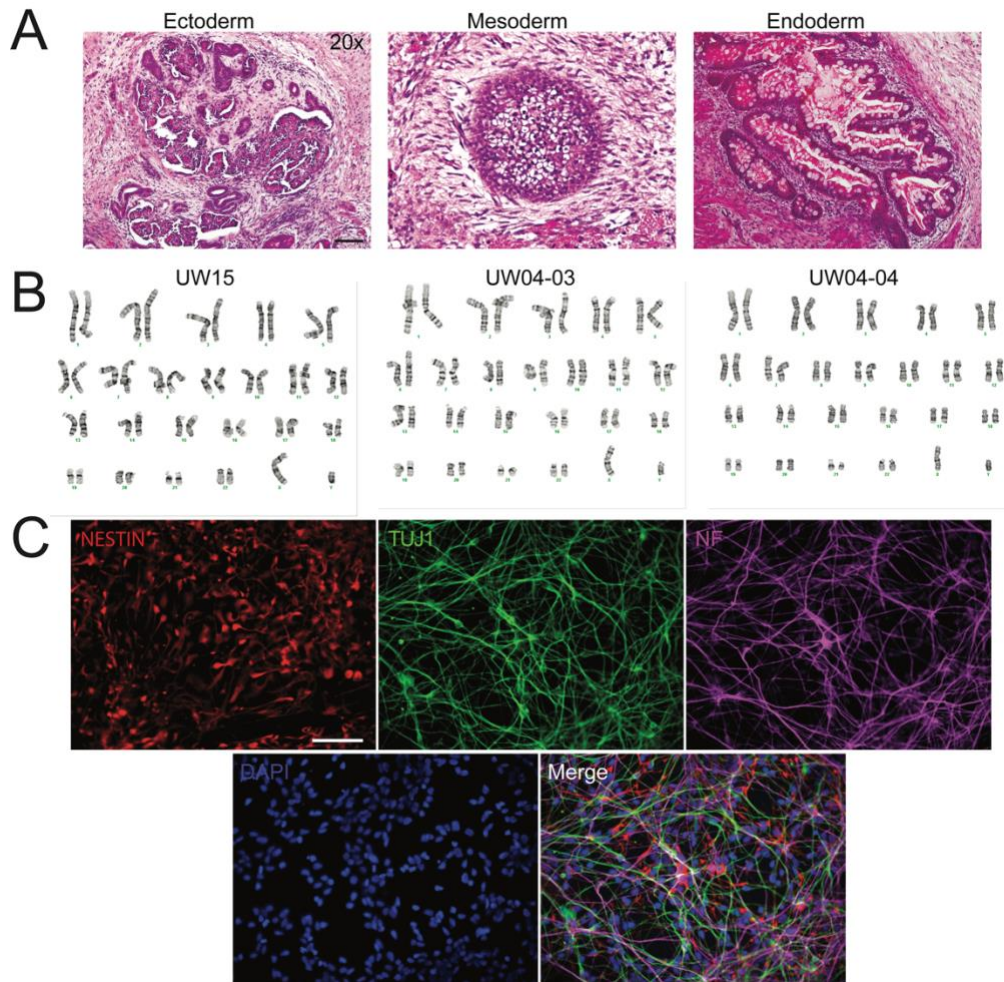

**Fig. S3.** (Supplemental data for **Figs. 6, S2**) Neurodifferentiation of JBST iPSCs. (A) HE staining of teratoma sections from JBST iPSCs demonstrating all three germ layers. Scale bar - 100 $\mu$ m. (B) Normal karyotype for all 3 JBST iPSCs. (C) Immunostaining of JBST iPSC-derived neurons for neuron markers NESTIN, TUJ1 and Neurofilament (NF). Scale bar - 100 $\mu$ m.

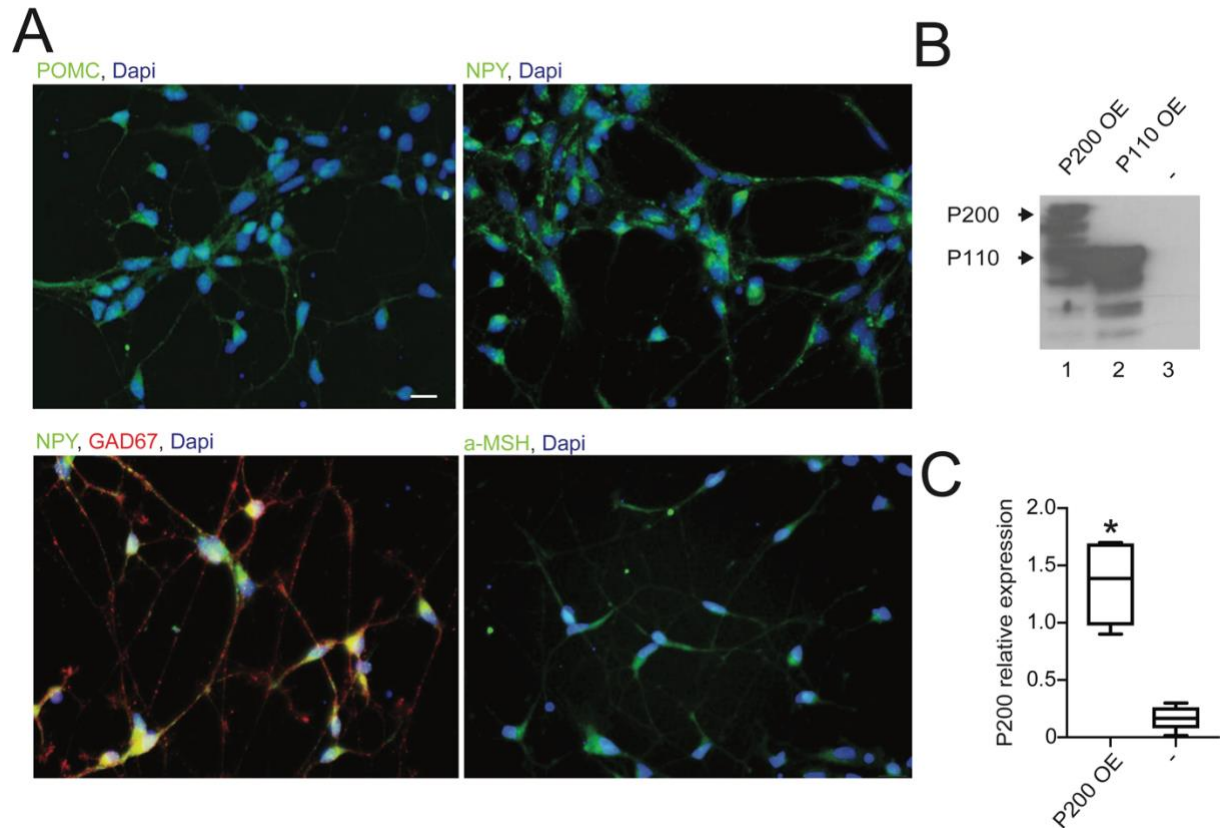

**Fig. S4.** (Supplemental data for **Fig. 8**) POMC staining of ESc-derived ARH neurons and ESc-derived P200 overexpression levels. (A) Staining of ESc-derived ARH neurons for POMC, NPY, alpha-Melanocyte-stimulating hormone ( $\alpha$ -MSH), and the GABAergic neuron marker Glutamate Decarboxylase (GAD67). Scale bar - 20 $\mu$ m. (B) Western blot of whole protein extracts from ESc-derived ARH JBST neurons overexpressing full-length CUX1 (P200, lane 1), whole protein extracts from 293FT cells (ThermoFisher Scientific) overexpressing CUX1 isoform P110 (lane 2), and whole protein extracts of ESc-derived ARH JBST neurons (lane 3). (C) P200 mRNA levels in ESc-derived ARH JBST neurons +/- P200 overexpression. Data in panel C are represented as box-and-whisker plots; boxes are the interquartile range, lines are the median value, and whiskers are minimum and maximum values. Each column represents the average of 6 isogenic cell lines. \* $P < 0.01$ , 2-tailed Student's  $t$  test.

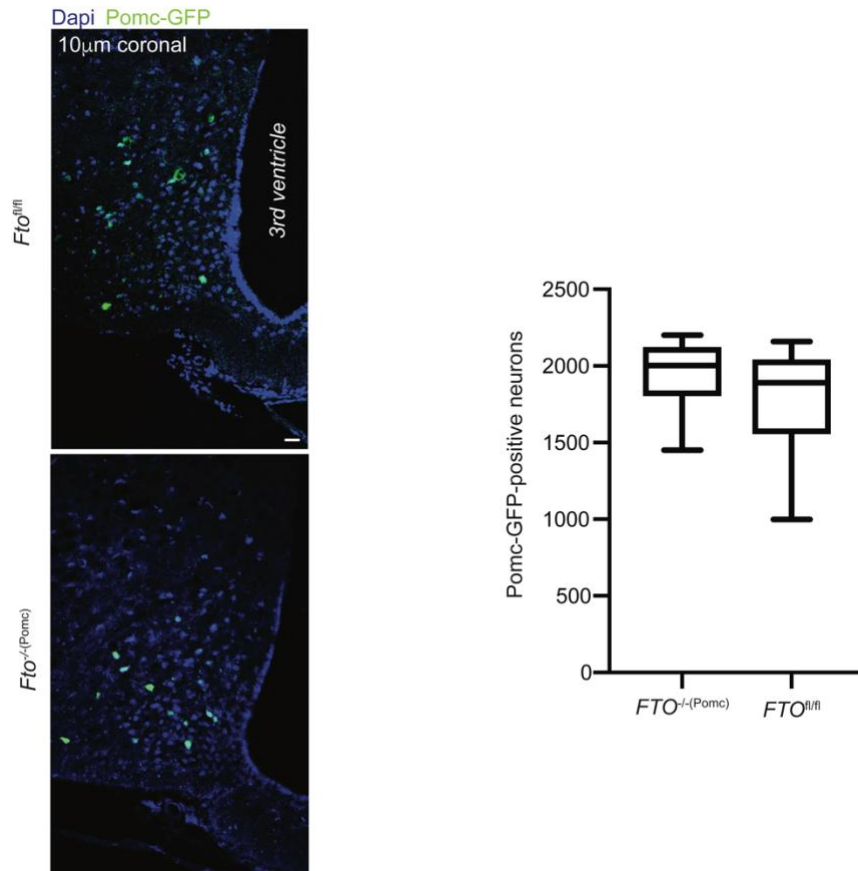

**Fig. S5.** (Supplemental data for **Fig. 4 & 8**) Congenital deletion of *Fto* in Pomc neurons has no effect on ARH Pomc neuron number. No difference in ARH Pomc neuron number between 6-week old *Fto*<sup>fl/fl</sup> mice segregating for the Pomc-Cre and Pomc-GFP alleles (*Fto*<sup>-/-</sup>(Pomc)) and *Fto*<sup>fl/fl</sup> littermates. *n*=6 per column. Data are represented as box-and-whisker plots; boxes are the interquartile range, lines are the median value, and whiskers are minimum and maximum values. Scale bar – 40μm.

**Table 1. Oligonucleotides for quantitative PCR**

| Gene      | Oligonucleotide pair                                           |
|-----------|----------------------------------------------------------------|
| RPGRIP1L  | 5'-CCATGGATCAAGCAATTCGACTTTATCGAG<br>5'-GGGACTGCAGGTGGTTGCAAC  |
| FTO       | 5-GAGCTTGAAGACACTTGGCTCCC<br>5-GCAGCCATGCTTGTGCAGTGTGA         |
| CUX1 P200 | 5'-CGAACAGAGCCGGGAGTTCAAGAA<br>5'-GCTTCCTTGCTTCTTTACTCAGTGCATC |
| IFT20     | 5'-GGTAACCTCTGGGTCCAACA<br>5'-CCTGTCTACATCAGCCTGGG             |
| IFT88     | 5'-GGTCCAAGACATCTCTGGCATCATCA<br>5'-AAATGCAGAGCCTCTCAAAGCTGC   |
| ADCY3     | 5'-CGCACAGGTAGAGGAAGACG<br>5'-ATCATCTCCGTGGTCTCCTG             |
| PATCHED1  | 5'-TTCTTGGTTGTGGCCTCCTCATA<br>5'-CTCTTCTCCAATCTTCTGGCGAGT      |
| GLI1      | 5'-ACAGTCCTTCTGTCCCCACA<br>5'-CCAGCGCCCAGACAGAG                |
| SOX2      | 5'-TTACCTCTTCTCCCACTCCAG<br>5'-GGGTTTTCTCCATGCTGTTTCT          |
| OCT4      | 5'-ATGCACAACGAGAGGATTTTGA<br>5'-CTTTGTGTTCCCAATTCCTTCC         |
| KLF4      | 5'-ACCCACACAGGTGAGAAACCTT<br>5'-GTTGGGAAGTTGACCATGATTG         |
| NANOG     | 5'-ACAAGTGGCCGAAGAATAGCA<br>5'-GGTTCCAGTCGGGTTTCC              |
| SOX2 V    | 5'-TTACCTCTTCTCCCACTCCAG<br>5'-AACCTACAGGTGGGGTCTTTCA          |
| OCT4 V    | 5'-ATGCACAACGAGAGGATTTTGA<br>5'-AACCTACAGGTGGGGTCTTTCA         |
| KLF4 V    | 5'-ACCCACACAGGTGAGAAACCTT<br>5'-AACCTACAGGTGGGGTCTTTCA         |
| c-MYC V   | 5'-AGCAGAGGAGCAAAAGCTCATT<br>5'-CCAAAGTCCAATTTGAGGCAGT         |
